# Supplementary material for: Identification of novel molecular regulators of tumor necrosis factor-related apoptosis-inducing ligand (TRAIL)-induced apoptosis in breast cancer cells by RNAi screening
Source: PubMed Central journal article supplement (PMC4053258; doi:10.1186/bcr3645), 2014-04-17
Supplement: bcr3645-S1.pdf [file bcr3645-S1.pdf]

Garimella et al., Table S2

| NCBI gene symbol | Entrez Gene Id | Gene Description                                                                         | mRNA Accessions                                           | siRNA Target Sequence 5'-3' | Product Id (Qiagen (Inc.)) | Vendor validated | In primary screen | siRNA Name  |
|------------------|----------------|------------------------------------------------------------------------------------------|-----------------------------------------------------------|-----------------------------|----------------------------|------------------|-------------------|-------------|
| ACTN4            | 81             | actinin, alpha 4                                                                         | NM_004924                                                 | CCCAGCAATCATCAACTCCAA       | SI02779980                 | Yes              | Yes               | siACTN4.1   |
|                  |                |                                                                                          |                                                           | ACGCAGCATCGTGGACTACAA       | SI02779973                 | Yes              | Yes               | siACTN4.2   |
|                  |                |                                                                                          |                                                           | AAGGTGCTGGCTGTCAACCAA       | SI00070098                 |                  | Yes               | siACTN4.3   |
|                  |                |                                                                                          |                                                           | CTGACACATAGTCGCAGGGAA       | SI00070084                 |                  | Yes               | siACTN4.4   |
| ATP5A1           | 498            | ATP synthase, H+ transporting, mitochondrial F1 complex, alpha subunit 1, cardiac muscle | NM_001001935<br>NM_001001937<br>NM_004046                 | TTGGCTGGATTGAAGCTTAA        | SI02776991                 | Yes              |                   | siATP5A1.1  |
|                  |                |                                                                                          |                                                           | ATGCTTTGGGTTTCATCTTTCA      | SI00306859                 |                  | Yes               | siATP5A1.2  |
|                  |                |                                                                                          |                                                           | CCCAGTTGGTGAAGAGACTTA       | SI00306852                 |                  | Yes               | siATP5A1.3  |
|                  |                |                                                                                          |                                                           | CCCGGTATCATTCTCGAATT        | SI00306866                 |                  | Yes               | siATP5A1.4  |
| BCL2L1           | 598            | BCL2-like 1                                                                              | NM_001191<br>NM_138578                                    | CAGTGCCTCACTTCTACAA         | SI03068352                 |                  |                   | siBCL2L1.1  |
|                  |                |                                                                                          |                                                           | TTGGCTTTGGATTAGAAGA         | SI03025141                 |                  |                   | siBCL2L1.2  |
|                  |                |                                                                                          |                                                           | TAGGGTGGCCCTTGCAATTCA       | SI03112018                 |                  |                   | siBCL2L1.3  |
|                  |                |                                                                                          |                                                           | CTGCTTGGGATAAAGATGCAA       | SI00023191                 |                  |                   | siBCL2L1.4  |
| BCR              | 613            | breakpoint cluster region                                                                | NM_004327<br>NM_021574                                    | AAGGCGGATTGAATCTCTTT        | Custom                     |                  | Yes               | siBCL2L1.5  |
|                  |                |                                                                                          |                                                           | CAGCCGCAACGGCAAGAGTTA       | SI00062762                 |                  | Yes               | siBCR.1     |
|                  |                |                                                                                          |                                                           | CAGCATTCGGCTGACCATCAA       | SI00288141                 | Yes              | Yes               | siBCR.2     |
|                  |                |                                                                                          |                                                           | ACGGCAGTCCATGACGGTGAA       | SI00288134                 | Yes              | Yes               | siBCR.3     |
| BIRC2            | 329            | baculoviral IAP repeat containing 2                                                      | NM_001166                                                 | AAGTCAACGACAAAGAGGTG        | SI00299425                 | Yes              |                   | siBCR.4     |
|                  |                |                                                                                          |                                                           | AACATAGTAGCTTGTTCAGTG       | SI02654435                 | Yes              |                   | siBIRC2.1   |
|                  |                |                                                                                          |                                                           | CTAGGAGACAGTCTTATCAA        | SI02654442                 | Yes              |                   | siBIRC2.2   |
|                  |                |                                                                                          |                                                           | TAGGCGTTTCTGATAACACTA       | SI00022855                 |                  | Yes               | siBIRC2.3   |
| CNKSR1           | 10256          | connector enhancer of kinase suppressor of Ras 1                                         | NM_006314                                                 | TCCCAGTCCCTCGTATCAA         | SI02625427                 |                  | Yes               | siBIRC2.4   |
|                  |                |                                                                                          |                                                           | CAGGGTGGCGTGTCCCTCCTA       | SI03571169                 | Yes              |                   | siCNKSR1.1  |
|                  |                |                                                                                          |                                                           | CAGGAGCTGCAGTCTAGAA         | SI00087402                 |                  | Yes               | siCNKSR1.2  |
|                  |                |                                                                                          |                                                           | GAGGGCTACTTCCAACCAA         | SI00087395                 |                  | Yes               | siCNKSR1.3  |
| FGFR4            | 2264           | fibroblast growth factor receptor 4                                                      | NM_002011<br>NM_022963<br>NM_213647                       | ACCCATGACTTCCAGAGCATA       | SI02665411                 | Yes              |                   | siCNKSR1.4  |
|                  |                |                                                                                          |                                                           | CAGGCTTCCGGCAAGTCAA         | SI02665306                 | Yes              |                   | siFGFR4.1   |
|                  |                |                                                                                          |                                                           | CAGGAGTTCTGGGCCTCTGA        | SI00031374                 |                  | Yes               | siFGFR4.2   |
|                  |                |                                                                                          |                                                           | CCGCCTGACCTTCGGACCCTA       | SI02659979                 | Yes              | Yes               | siFGFR4.3   |
| HIPK2            | 28996          | homeodomain interacting protein kinase 2                                                 | NM_001113239<br>NM_022740                                 | CACATTGACTACTATAAGAAA       | SI00031360                 |                  | Yes               | siFGFR4.4   |
|                  |                |                                                                                          |                                                           | AAGCGTCGGGTGAATATGTAT       | SI04439393                 |                  |                   | siHIPK2.1   |
|                  |                |                                                                                          |                                                           | TCCGAAGTCTCCATACTAAA        | SI02659818                 | Yes              |                   | siHIPK2.2   |
|                  |                |                                                                                          |                                                           | CCAGGTGAACATGACGACAGA       | SI04439386                 |                  |                   | siHIPK2.3   |
| IKBKB            | 3551           | inhibitor of kappa light polypeptide gene enhancer in B-cells, kinase beta               | NM_001190720<br>NM_001190721<br>NM_001242778<br>NM_001556 | AACAGTACCCTTACATATA         | SI02659811                 | Yes              |                   | siHIPK2.4   |
|                  |                |                                                                                          |                                                           | TAGGAGCTATTTCATGTTTCA       | SI02626456                 |                  | Yes               | siIKBKB.1   |
|                  |                |                                                                                          |                                                           | CAGACCACATTGTGGACTTA        | SI02626442                 |                  | Yes               | siIKBKB.2   |
|                  |                |                                                                                          |                                                           | CTGGAGAAGTACAGCGAGCAA       | SI02777376                 | Yes              |                   | siIKBKB.3   |
| MKNK1            | 8569           | MAP kinase interacting serine/threonine kinase 1                                         | NM_001135553<br>NM_003684<br>NM_198973                    | AAACCGAGTTTGGGATCACAT       | SI00300545                 | Yes              |                   | siIKBKB.4   |
|                  |                |                                                                                          |                                                           | TAGATAGTGTCTGTGCCTAA        | SI02621962                 | Yes              |                   | siMKNK1.1   |
|                  |                |                                                                                          |                                                           | CACGGACCAGGCCACATTCTA       | SI00054663                 |                  |                   | siMKNK1.2   |
|                  |                |                                                                                          |                                                           | CAGCACGAAGAGAACGAATA        | SI00054649                 |                  | Yes               | siMKNK1.3   |
| PDPK1            | 5170           | 3-phosphoinositide dependent protein kinase-1                                            | NM_002613<br>NM_031268                                    | CCAGCAAAGATGATACCTTAA       | SI02621955                 | Yes              | Yes               | siMKNK1.4   |
|                  |                |                                                                                          |                                                           | AACAAGTTCTGAAAGGTGAA        | SI00301154                 | Yes              |                   | siPDPK1.1   |
|                  |                |                                                                                          |                                                           | CACGCCTAACAGGACGTATTA       | SI00605787                 | Yes              | Yes               | siPDPK1.2   |
|                  |                |                                                                                          |                                                           | AAGGGCATCTTCCAGGGAC         | SI00301140                 | Yes              |                   | siPDPK1.3   |
| PIP5K1C          | 23396          | phosphatidylinositol-4-phosphate 5-kinase, type I, gamma                                 | NM_001195733<br>NM_012398                                 | AAGCGTTAGGCTGTGAGGAA        | SI00605780                 | Yes              | Yes               | siPDPK1.4   |
|                  |                |                                                                                          |                                                           | CGCGCCCGCCACCGACATCTA       | SI02758966                 | Yes              |                   | siPIP5K1C.1 |
|                  |                |                                                                                          |                                                           | CCGCGTGTGGTTCATGAACAA       | SI02224376                 | Yes              | Yes               | siPIP5K1C.2 |
|                  |                |                                                                                          |                                                           | CGGCGAAACCACCTACAAGAA       | SI00099967                 |                  | Yes               | siPIP5K1C.3 |
| PLK3             | 1263           | polo-like kinase 3                                                                       | NM_004073                                                 | CGGCAAGACCTATTATAATA        | SI00099953                 |                  | Yes               | siPIP5K1C.4 |
|                  |                |                                                                                          |                                                           | CCCGAAATCGTAGTCTTGTA        | SI02223466                 | Yes              | Yes               | siPLK3.1    |
|                  |                |                                                                                          |                                                           | GTGGGTTGACTACTCCAATAA       | SI00059395                 |                  | Yes               | siPLK3.2    |
|                  |                |                                                                                          |                                                           | CAGAAAGACTGTGCACTACAA       | SI00059388                 |                  | Yes               | siPLK3.3    |
| PRKCI            | 5584           | protein kinase C, iota                                                                   | NM_002740                                                 | CTGCATCAAGCAGGTTCACTA       | SI02223473                 | Yes              | Yes               | siPLK3.4    |
|                  |                |                                                                                          |                                                           | AACAGGTGGTACCTCCCTTTA       | SI00301336                 | Yes              |                   | siPRKCI.1   |
|                  |                |                                                                                          |                                                           | ACGCCGTGGAGAAAGCTTTA        | SI02660084                 | Yes              | Yes               | siPRKCI.2   |
|                  |                |                                                                                          |                                                           | CAGATTGTTCTTTGTTATAGA       | SI02660098                 | Yes              |                   | siPRKCI.3   |
| RIOK3            | 8780           | RIO kinase 3 (yeast)                                                                     | NM_003831<br>NM_145906                                    | TCCGGTAATAGGAAGAGGAA        | SI02660091                 | Yes              | Yes               | siPRKCI.4   |
|                  |                |                                                                                          |                                                           | CAGACTGTGGCCGTATTCTA        | SI00056525                 |                  | Yes               | siRIOK3.1   |
|                  |                |                                                                                          |                                                           | ATGGGTGACTTGAATACCAA        | SI00056504                 |                  | Yes               | siRIOK3.2   |
|                  |                |                                                                                          |                                                           | CTGGCTGTATTAGTACAGGAA       | SI02223403                 | Yes              | Yes               | siRIOK3.3   |
| SRC              | 6714           | v-src sarcoma (Schmidt-Ruppin A-2) viral oncogene homolog (avian)                        | NM_005417<br>NM_198291                                    | ATGCGGCAGTTATATCATGAA       | SI02223396                 | Yes              | Yes               | siRIOK3.4   |
|                  |                |                                                                                          |                                                           | CTCCATGTGGCTCCATATTTA       | SI02664151                 | Yes              | Yes               | siSRC.1     |
|                  |                |                                                                                          |                                                           | TCCATGTGCGTCCATATTAA        | SI00076832                 |                  | Yes               | siSRC.2     |
|                  |                |                                                                                          |                                                           | AAGCAGTGCCTGCCTATGAAA       | SI02223921                 | Yes              | Yes               | siSRC.3     |
|                  |                |                                                                                          |                                                           | CGGCTTGTGGGTGATGTTTGA       | SI02223928                 | Yes              | Yes               | siSRC.4     |
