# Supplementary material for: Identification of novel molecular regulators of tumor necrosis factor-related apoptosis-inducing ligand (TRAIL)-induced apoptosis in breast cancer cells by RNAi screening
Source: PubMed Central journal article supplement (PMC4053258; doi:10.1186/bcr3645), 2014-04-17
Supplement: bcr3645-S3.pdf [file bcr3645-S3.pdf]

Garimella et al., Table S3

|                                          |          | Z' siNeg vs<br>siCelldeath | Z' siNeg vs<br>siCelldeath | Z' siFLIP No TRAIL<br>vs. TRAIL | Z' siFLIP          |
|------------------------------------------|----------|----------------------------|----------------------------|---------------------------------|--------------------|
|                                          |          | No TRAIL                   | PLUS TRAIL                 | No TRAIL vs. TRAIL              | No TRAIL vs. TRAIL |
| Screen                                   | Plate    | Cell viability             | Cell viability             | Caspase 3/7                     | Caspase 8          |
| Kinome gene set plus additional gene set | Plate 1  | 0.64                       | 0.54                       | 0.35                            | N/A                |
|                                          | Plate 2  | 0.76                       | 0.69                       | 0.63                            | 0.09               |
|                                          | Plate 3  | 0.79                       | 0.67                       | 0.71                            | 0.20               |
|                                          | Plate 4  | 0.74                       | 0.63                       | 0.24                            | 0.26               |
|                                          | Plate 5  | 0.71                       | 0.73                       | 0.61                            | 0.32               |
|                                          | Plate 6  | 0.36                       | 0.67                       | 0.78                            | 0.54               |
|                                          | Plate 7  | 0.58                       | 0.68                       | 0.29                            | 0.33               |
|                                          | Plate 8  | 0.54                       | 0.72                       | 0.74                            | 0.21               |
|                                          | Plate 9  | 0.41                       | 0.55                       | 0.66                            | 0.25               |
|                                          | Plate 10 | 0.53                       | 0.61                       | 0.57                            | 0.32               |
|                                          | Plate 11 | 0.73                       | 0.55                       | 0.35                            | 0.23               |
|                                          | Plate 12 | 0.69                       | 0.66                       | 0.15                            | 0.40               |
| Phosphatome gene set                     | Plate 1  | 0.35                       | 0.20                       | 0.65                            | -                  |
|                                          | Plate 2  | 0.22                       | 0.18                       | 0.70                            | -                  |
|                                          | Plate 3  | N/A                        | 0.77                       | 0.78                            | -                  |
|                                          | Plate 4  | N/A                        | 0.31                       | 0.73                            | -                  |
| <b>Z'</b>                                |          | <b>Interpretation</b>      |                            |                                 |                    |
| Between 0.5 and 1.0                      |          | An excellent assay         |                            |                                 |                    |
| Between 0 and 0.5                        |          | A less robust assay        |                            |                                 |                    |
