# Supplementary material for: Identification of novel molecular regulators of tumor necrosis factor-related apoptosis-inducing ligand (TRAIL)-induced apoptosis in breast cancer cells by RNAi screening
Source: PubMed Central journal article supplement (PMC4053258; doi:10.1186/bcr3645), 2014-04-17
Supplement: bcr3645-S7.pdf [file bcr3645-S7.pdf]

| <b>Caspase 3/7 Assay (Fold change relative to siNegative transfected cells, No TRAIL)</b> |                 |       |       |       |              |       |       |       |                           |                 |      |       |      |              |      |      |       |
|-------------------------------------------------------------------------------------------|-----------------|-------|-------|-------|--------------|-------|-------|-------|---------------------------|-----------------|------|-------|------|--------------|------|------|-------|
| <b>MB231 (TNBC-BASAL B)</b>                                                               |                 |       |       |       |              |       |       |       | <b>T47D (ER Positive)</b> |                 |      |       |      |              |      |      |       |
|                                                                                           | <b>NO TRAIL</b> |       |       |       | <b>TRAIL</b> |       |       |       |                           | <b>NO TRAIL</b> |      |       |      | <b>TRAIL</b> |      |      |       |
|                                                                                           | Mean            | StDev | Mean  | StDev |              | Mean  | StDev | Mean  | StDev                     |                 | Mean | StDev | Mean | StDev        |      | Mean | StDev |
| siNeg                                                                                     | 1.00            | 0.31  | 12.11 | 2.40  | siNeg        | 1.00  | 0.10  | 1.78  | 0.30                      |                 |      |       |      |              |      |      |       |
| siCASP8                                                                                   | 1.04            | 0.21  | 2.30  | 0.63  | siCASP8      | 0.94  | 0.08  | 1.02  | 0.26                      |                 |      |       |      |              |      |      |       |
| siFLIP                                                                                    | 1.27            | 0.27  | 18.71 | 2.16  | siFLIP       | 0.98  | 0.11  | 1.26  | 0.20                      |                 |      |       |      |              |      |      |       |
| GENE/siRNA                                                                                | 1               | 2     | 3     | 4     | 1            | 2     | 3     | 4     | GENE/siRNA                | 1               | 2    | 3     | 4    | 1            | 2    | 3    | 4     |
| BCL2L1                                                                                    | 3.45            | 1.72  | 2.94  | 1.39  | 80.88        | 39.30 | 31.46 | 22.06 | BCL2L1                    | 3.05            | 1.32 | 1.22  | 0.98 | 6.00         | 3.91 | 4.92 | 6.15  |
| BIRC2                                                                                     | 1.71            | 3.15  | 1.90  | 2.36  | 58.46        | 38.27 | 23.13 | 17.11 | BIRC2                     | 0.87            | 1.02 | 1.03  | 1.02 | 3.83         | 2.33 | 2.73 | 2.18  |
| CNKSR1                                                                                    | 0.91            | 0.75  | 1.50  | 0.69  | 51.54        | 36.50 | 24.17 | 12.50 | CNKSR1                    | 0.94            | 0.89 | 0.85  | 0.85 | 3.28         | 6.36 | 1.71 | 1.80  |
| MKNK1                                                                                     | 1.02            | 1.31  | 0.91  | 0.81  | 47.02        | 23.01 | 15.17 | 7.44  | MKNK1                     | 0.93            | 1.02 | 0.95  | 0.94 | 1.38         | 5.28 | 3.50 | 1.86  |
| BCR                                                                                       | 0.89            | 1.88  | 0.79  | 1.14  | 44.33        | 36.15 | 35.54 | 25.83 | BCR                       | 1.11            | 1.08 | 1.11  | 0.93 | 3.95         | 3.60 | 2.14 | 5.72  |
| PDPK1                                                                                     | 1.12            | 1.05  | 1.05  | 1.88  | 40.51        | 26.36 | 17.66 | 12.72 | PDPK1                     | 1.00            | 0.78 | 0.95  | 0.93 | 4.02         | 2.29 | 2.06 | 8.74  |
| PIP5K1C                                                                                   | 1.01            | 1.40  | 1.25  | 0.88  | 39.04        | 28.34 | 35.19 | 20.28 | PIP5K1C                   | 1.02            | 1.16 | 0.99  | 1.46 | 2.37         | 2.24 | 2.84 | 1.69  |
| FGFR4                                                                                     | 1.17            | 0.84  | 0.82  | 0.80  | 37.24        | 25.10 | 24.27 | 12.33 | FGFR4                     | 0.99            | 1.00 | 1.05  | 0.90 | 2.30         | 5.57 | 5.01 | 1.56  |
| ATP5A1                                                                                    | 1.37            | 0.84  | 1.07  | 0.85  | 36.56        | 31.29 | 27.78 | 17.28 | ATP5A1                    | 1.48            | 1.01 | 0.90  | 1.12 | 5.87         | 8.59 | 2.93 | 2.43  |
| SRC                                                                                       | 1.45            | 0.84  | 1.23  | 1.01  | 35.23        | 25.62 | 11.94 | 18.79 | SRC                       | 1.01            | 1.11 | 1.15  | 0.75 | 4.03         | 4.79 | 2.34 | 1.36  |
| ACTN4                                                                                     | 1.00            | 1.44  | 0.94  | 1.27  | 33.06        | 26.34 | 24.13 | 23.36 | ACTN4                     | 0.89            | 0.98 | 0.90  | 0.81 | 2.93         | 2.22 | 4.28 | 2.83  |
| PLK3                                                                                      | 0.95            | 1.07  | 1.58  | 1.11  | 31.57        | 30.63 | 29.29 | 13.62 | PLK3                      | 1.01            | 1.06 | 0.93  | 1.15 | 3.23         | 2.22 | 1.26 | 1.81  |
| PRKCI                                                                                     | 1.00            | 0.78  | 0.94  | 1.29  | 29.01        | 25.22 | 17.45 | 16.99 | PRKCI                     | 1.15            | 1.19 | 0.95  | 1.02 | 2.67         | 2.00 | 1.68 | 3.72  |
| RIOK3                                                                                     | 1.34            | 1.28  | 1.17  | 0.94  | 26.19        | 24.92 | 23.51 | 16.72 | RIOK3                     | 0.99            | 1.03 | 1.32  | 1.02 | 2.08         | 2.12 | 2.03 | 2.15  |
| HIPK2                                                                                     | 0.76            | 0.78  | 0.88  | 0.78  | 23.11        | 19.69 | 15.20 | 8.68  | HIPK2                     | 1.10            | 0.91 | 0.89  | 0.90 | 1.56         | 2.75 | 2.22 | 1.08  |
| IKBKB                                                                                     | 1.09            | 0.93  | 1.35  | 0.81  | 19.73        | 14.55 | 13.70 | 9.69  | IKBKB                     | 1.04            | 1.23 | 0.91  | 0.87 | 1.98         | 1.91 | 1.10 | 1.62  |

  

| <b>MB468 (TNBC-BASAL A)</b> |                 |       |      |       |              |       |       |      | <b>SKBR3 (HER2 amplified)</b> |                 |      |       |      |              |      |      |       |
|-----------------------------|-----------------|-------|------|-------|--------------|-------|-------|------|-------------------------------|-----------------|------|-------|------|--------------|------|------|-------|
|                             | <b>NO TRAIL</b> |       |      |       | <b>TRAIL</b> |       |       |      |                               | <b>NO TRAIL</b> |      |       |      | <b>TRAIL</b> |      |      |       |
|                             | Mean            | StDev | Mean | StDev |              | Mean  | StDev | Mean | StDev                         |                 | Mean | StDev | Mean | StDev        |      | Mean | StDev |
| siNeg                       | 1.00            | 0.08  | 4.56 | 0.08  | siNeg        | 1.00  | 0.12  | 1.21 | 0.19                          |                 |      |       |      |              |      |      |       |
| siCASP8                     | 0.87            | 0.08  | 1.51 | 0.41  | siCASP8      | 1.03  | 0.19  | 0.85 | 0.16                          |                 |      |       |      |              |      |      |       |
| siFLIP                      | 1.19            | 0.10  | 8.53 | 1.07  | siFLIP       | 1.07  | 0.11  | 1.37 | 0.26                          |                 |      |       |      |              |      |      |       |
| GENE/siRNA                  | 1               | 2     | 3    | 4     | 1            | 2     | 3     | 4    | GENE/siRNA                    | 1               | 2    | 3     | 4    | 1            | 2    | 3    | 4     |
| BCL2L1                      | 4.84            | 0.98  | 1.65 | 1.08  | 11.24        | 6.16  | 6.74  | 4.56 | BCL2L1                        | 1.13            | 1.11 | 0.97  | 1.17 | 3.70         | 1.44 | 1.48 | 1.46  |
| BIRC2                       | 2.46            | 1.85  | 1.31 | 1.52  | 9.32         | 11.05 | 5.67  | 6.31 | BIRC2                         | 1.07            | 1.01 | 1.15  | 1.53 | 1.96         | 1.09 | 1.78 | 2.00  |
| CNKSR1                      | 1.53            | 0.71  | 0.77 | 0.98  | 9.07         | 8.64  | 6.57  | 6.09 | CNKSR1                        | 1.12            | 1.41 | 1.05  | 0.80 | 0.85         | 1.06 | 0.81 | 0.99  |
| MKNK1                       | 2.55            | 2.44  | 1.82 | 0.76  | 8.86         | 8.15  | 9.08  | 1.85 | MKNK1                         | 0.85            | 1.04 | 1.39  | 1.05 | 1.60         | 1.04 | 1.16 | 0.80  |
| BCR                         | 1.48            | 1.61  | 1.01 | 1.13  | 10.70        | 8.10  | 5.15  | 9.83 | BCR                           | 0.99            | 1.32 | 1.05  | 1.16 | 0.86         | 1.17 | 1.46 | 1.80  |
| PDPK1                       | 1.22            | 1.61  | 1.10 | 1.85  | 8.38         | 8.25  | 6.69  | 7.63 | PDPK1                         | 1.31            | 1.60 | 0.73  | 1.01 | 1.90         | 1.34 | 1.30 | 1.98  |
| PIP5K1C                     | 1.10            | 2.41  | 2.65 | 1.35  | 6.66         | 7.60  | 10.26 | 6.19 | PIP5K1C                       | 0.91            | 0.98 | 1.35  | 1.33 | 0.88         | 1.30 | 1.49 | 1.10  |
| FGFR4                       | 4.22            | 1.11  | 2.91 | 0.99  | 8.35         | 8.19  | 6.94  | 5.85 | FGFR4                         | 1.20            | 1.21 | 1.05  | 1.18 | 1.57         | 1.95 | 1.26 | 1.13  |
| ATP5A1                      | 1.81            | 1.88  | 1.45 | 1.22  | 6.14         | 9.89  | 8.38  | 9.82 | ATP5A1                        | 1.29            | 0.85 | 1.34  | 1.05 | 1.39         | 2.06 | 1.18 | 1.06  |
| SRC                         | 1.21            | 0.89  | 0.98 | 0.97  | 10.10        | 8.90  | 4.54  | 8.36 | SRC                           | 1.10            | 0.83 | 0.78  | 1.03 | 1.43         | 0.92 | 0.89 | 0.79  |
| ACTN4                       | 1.89            | 1.98  | 1.06 | 1.47  | 8.84         | 19.58 | 11.78 | 8.26 | ACTN4                         | 1.10            | 1.07 | 0.89  | 0.85 | 1.75         | 2.06 | 1.25 | 1.59  |
| PLK3                        | 2.19            | 1.50  | 2.13 | 1.60  | 11.06        | 10.09 | 5.85  | 4.26 | PLK3                          | 1.14            | 0.90 | 1.08  | 0.87 | 1.92         | 1.05 | 0.94 | 1.04  |
| PRKCI                       | 1.20            | 1.79  | 1.05 | 1.84  | 8.51         | 4.45  | 7.42  | 7.17 | PRKCI                         | 0.69            | 0.88 | 1.20  | 1.12 | 1.29         | 1.15 | 1.26 | 1.97  |
| RIOK3                       | 1.10            | 1.48  | 1.12 | 1.36  | 6.77         | 10.02 | 5.43  | 9.07 | RIOK3                         | 1.33            | 1.06 | 0.89  | 1.04 | 1.02         | 1.10 | 1.46 | 1.30  |
| HIPK2                       | 1.20            | 1.17  | 1.14 | 1.20  | 8.86         | 5.80  | 6.96  | 9.60 | HIPK2                         | 1.24            | 0.76 | 0.99  | 1.25 | 1.25         | 0.92 | 1.36 | 1.50  |
| IKBKB                       | 0.93            | 0.81  | 1.92 | 1.08  | 5.84         | 3.96  | 6.47  | 4.90 | IKBKB                         | 1.05            | 1.00 | 1.13  | 0.91 | 1.19         | 1.09 | 1.26 | 1.05  |
