# Supplementary material for: Identification of novel molecular regulators of tumor necrosis factor-related apoptosis-inducing ligand (TRAIL)-induced apoptosis in breast cancer cells by RNAi screening
Source: PubMed Central journal article supplement (PMC4053258; doi:10.1186/bcr3645), 2014-04-17

Figure S5

A

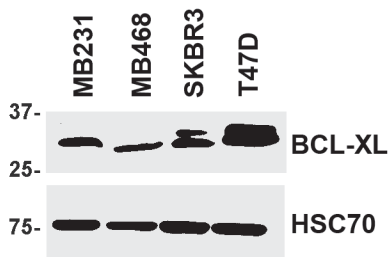

B

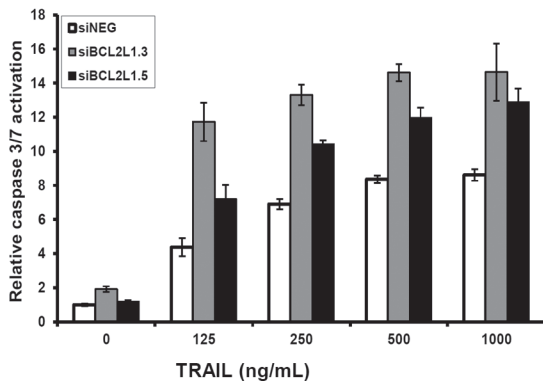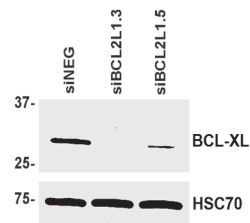

C

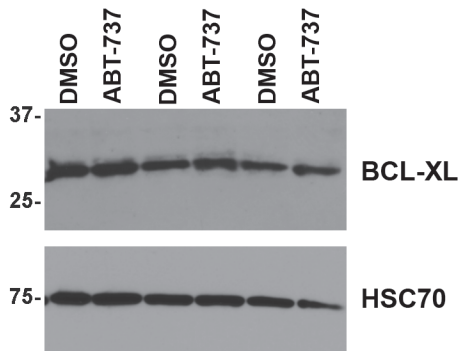

Supplement: bcr3645-S9.pdf [file bcr3645-S9.pdf]
